# Subject Index

## Allantoic endoderm

implanted into presumptive digestive area  
in chick embryos: YASUGI 137

## *Ambystoma mexicanum*

*in vitro* development of isolated ectoderm  
from gastrulae: SLACK 321  
regional biosynthetic markers in early embryonic development: SLACK 289

## Amphibia

### axolotl

*in vitro* development of isolated  
ectoderm from gastrulae: SLACK 321

## Antisera

used to study differentiation of allantoic endoderm in avian embryos: YASUGI 137

## Apical ectodermal ridge (AER)

effect on myogenic cell movements in  
avian limb bud: GUMPEL-PINOT, EDE & FLINT 105  
development in chick wing bud: TODT & FALLON 21

## Apoptosis

associated with cavitation in  
teratocarcinoma-derived embryoid  
bodies: BOYD, HOOPER & WYLLIE 63

## Axolotl

*in vitro* development of isolated ectoderm  
from gastrulae: SLACK 321  
regional biosynthetic markers in early embryonic development: SLACK 289

## Canine

ontogeny of haemopoietic progenitor cells  
(GM-CFC): NOTHDURFT, BRAASCH,  
CALVO, PRÜMMER, CARBONELL, GRILLI & FLIEDNER 87

## Cell death

associated with cavitation in  
teratocarcinoma-derived embryoid  
bodies: BOYD, HOOPER & WYLLIE 63  
in chick optic cup—evidence for new  
necrotic area: GARCÍA-PORRERO, COLVÉE & OJEDA 241  
in development of apical ectodermal ridge  
in chick wing bud: TODT & FALLON 21

## Cell lineage

in chimaeric hydra from normal and slow-budding strains: TAKANO & SUGIYAMA 155

## Cell marker

for clonal analysis of mouse extraembryonic  
endoderm development: GARDNER 251

## Cell movement

in developing avian limb bud in presence  
and absence of AER: GUMPEL-PINOT, EDE  
& FLINT 105

## Chick

### embryo

cell death in dorsal part of optic cup:  
GARCÍA-PORRERO, COLVÉE & OJEDA 241  
development of apical ectodermal ridge  
in wing bud: TODT & FALLON 21  
differentiation of allantoic endoderm  
studied with antigens: YASUGI 137  
myogenic cell movement in presence  
and absence of AER: GUMPEL-PINOT,  
EDE & FLINT 105  
SEM localization of cell-surface-  
associated fibronectin in cranium:  
MEIER & DRAKE 175  
spatially periodic patterns created by  
mechanical instability: HARRIS, STOPAK  
& WARNER 1

## Chimaeras

### in hydra

genetic analysis of developmental  
mechanisms: TAKANO & SUGIYAMA 155

## Clonal analysis

of development of extraembryonic endoderm in the mouse: GARDNER 251

## Cranial neural crest

localization of fibronectin in chick embryos: MEIER & DRAKE 175

## Culture

of isolated early mouse inner cell masses:  
NICHOLS & GARDNER 225

## Cytokeratins

as regional biosynthetic markers in early  
amphibian embryo: SLACK 289

## Cytoskeleton

role in control of intravittelline mitoses in  
*Drosophila* embryos: TOGASHI & OKADA 43

## Determination

mechanism in early development of axolotl embryos: SLACK 289

***Drosophila melanogaster***

## egg

- arrest of intravitelline mitoses by u.v. irradiation of surface: TOGASHI & OKADA 43

**Ectoderm**

- isolated from axolotl gastrulae— *in vitro* development: SLACK 321

**EK cells**

- effect on parthenogenetic development in mouse embryos: KAUFMAN, EVANS, ROBERTSON & BRADLEY 75

**Embryoid body**

- mode of cell death associated with cavitation: BOYD, HOOPER & WYLLIE 63

**Epidermis**

- development from isolated ectoderm of axolotl gastrulae: SLACK 321

**Epimucin**

- as regional biosynthetic markers in early amphibian embryo: SLACK 289

**Epithelial-mesenchymal interaction**

- between allantoic endoderm and presumptive digestive area tissues: YASUGI 137

**External cells**

- heterogeneous differentiation in isolated mouse ICMs in culture: NICHOLS & GARDNER 225

**Extraembryonic ectoderm**

- differentiation in isolated early mouse ICMs in culture: NICHOLS & GARDNER 225

**Feather germs**

- spatially periodic patterns created by mechanical instability: HARRIS, STOPAK & WARNER 1

**Fibroblast traction**

- in feather germ pattern formation in chick embryos: HARRIS, STOPAK & WARNER 1

**Fibronectin**

- associated with cell surface in chick embryo cranium: MEIER & DRAKE 175

**Glycolipids**

- in early amphibian embryos: SLACK 289

**Glycoproteins**

- as regional biosynthetic markers in early amphibian embryo: SLACK 289

**Granulocyte progenitor cell (GM-CFC)**

- ontogeny in the beagle dog: NOTHDURFT, BRAASCH, CALVO, PRÜMMER, CARBONELL, GRILLI & FLIEDNER 87

**Gravity**

- role in pattern formation in inverted *Xenopus* eggs: NEFF, WAKAHARA, JURAND & MALACINSKI 197

**Haemopoietic progenitor cells (GM CFC)**

- ontogeny in the beagle dog: NOTHDURFT, BRAASCH, CALVO, PRÜMMER, CARBONELL, GRILLI & FLIEDNER 87

**Hydra**

- analysis of chimaeras from normal and slow-budding strains: TAKANO & SUGIYAMA 155

**Immunolabelled microspheres**

- used to locate fibronectin in chick embryo cranium: MEIER & DRAKE 175

**Inner cell masses**

- isolated from mouse blastocysts: NICHOLS & GARDNER 225

**Inverted eggs**

- of *Xenopus*—cytoplasmic rearrangements after fertilization: NEFF, WAKAHARA, JURAND & MALACINSKI 197

**In situ**

- cell marker for clonal analysis of mouse development: GARDNER 251

**In vitro**

- culture of rat visceral yolk sac: LU, SOBIS, VAN HOVE & VANDEPUTTE 127

**Limb bud**

- cell movements in presence and absence of apical ectodermal ridge: GUMPEL-PINOT, EDE & FLINT 105

**Limb development**

- of chick—apical ectodermal ridge in wing bud: TODT & FALLON 21

**Malic enzyme activity**

- as cell marker for clonal analysis of development in mouse: GARDNER 251

**Mammals**

- ontogeny of haemopoietic progenitor cells (GM-CFC) in the dog: NOTHDURFT, BRAASCH, CALVO, PRÜMMER, CARBONELL, GRILLI & FLIEDNER 87

**Mechanical instability**

- model for generation of spatially periodic patterns: HARRIS, STOPAK & WARNER 1

**Metamerism**

- in localization of fibronectin during development of chick cranium: MEIER & DRAKE 175

**Mitotic cycle**

in *Drosophila* embryos after u.v. irradiation of egg surface: TOGASHI & OKADA 43

**Mouse**

blastocytes

culture of isolated inner cell masses: NICHOLS & GARDNER 225

embryo

effect of injected pluripotential cells on parthenogenetic development: KAUFMAN, EVANS, ROBERTSON & BRADLEY 75

*in situ* marker for clonal analysis of extraembryonic endoderm: GARDNER 251

**Myogenic cells**

movement in developing avian limb bud: GUMPEL-PINOT, EDE & FLINT 105

**Necrosis**

associated with cavitation in teratocarcinoma-derived embryoid bodies: BOYD, HOOPER & WYLLIE 63

**Necrotic area**

in chick optic cup development: GARCÍA-PORRERO, COLVÉE & OJEDA 241

**Optic cup**

evidence for new necrotic area in chick embryo: GARCÍA-PORRERO, COLVÉE & OJEDA 241

**Organ culture**

of rat visceral yolk sac: LU, SOBIS, VAN HOVE & VANDEPUTTE 127

**Parietal endoderm**

*in situ* cell marker for clonal analysis in mouse: GARDNER 251

**Parthenogenetic embryos**

influence of injected pluripotential (EK) cells: KAUFMAN, EVANS, ROBERTSON & BRADLEY 75

**Pattern formation**

after fertilization of inverted *Xenopus* eggs: NEFF, WAKAHARA, JURAND & MALACINSKI 197

in feather germs in chick embryo—mechanical instability model: HARRIS, STOPAK & WARNER 1

**Pluripotential cells (EK)**

effect on parthenogenetic development in mouse embryos: KAUFMAN, EVANS, ROBERTSON & BRADLEY 75

**Quail**

allantoic endoderm

implanted into presumptive digestive area in chick: YASUGI 137

**Rat**

visceral yolk sac

differentiation potentiality in organ culture: LU, SOBIS, VAN HOVE & VANDEPUTTE 127

**Regulation mechanism**

for intravitelline mitoses in *Drosophila* embryos: TOGASHI & OKADA 43

**Retina**

evidence for new necrotic area in chick optic cup: GARCÍA-PORRERO, COLVÉE & OJEDA 241

**Teratocarcinoma**

derived embryoid bodies—mode of cell death during cavitation: BOYD, HOOPER & WYLLIE 63

**Trophectoderm**

differentiation in isolated early mouse ICMs in culture: NICHOLS & GARDNER 225

**U.v. irradiation**

of *Drosophila* egg surface causes arrest of intravitelline mitoses: TOGASHI & OKADA 43

**Visceral endoderm**

*in situ* cell marker for clonal analysis in mouse: GARDNER 251

**Visceral yolk sac**

of rat in organ culture: LU, SOBIS, VAN HOVE & VANDEPUTTE 127

**Vital staining**

of chick optic cup—evidence for new necrotic area: GARCÍA-PORRERO, COLVÉE & OJEDA 241

***Xenopus laevis***

egg

cytoplasmic rearrangements after fertilization of inverted eggs: NEFF, WAKAHARA, JURAND & MALACINSKI 197

**Yolk platelets**

distribution in inverted *Xenopus* eggs following fertilization: NEFF, WAKAHARA, JURAND & MALACINSKI 197
